# Supplementary material for: Structural characterization of HypX responsible for CO biosynthesis in the maturation of NiFe-hydrogenase
Source: PubMed Central journal article supplement (PMC6802093; doi:10.1038/s42003-019-0631-z), 2019-10-18
Supplement: 42003_2019_631_MOESM1_ESM.pdf [file 42003_2019_631_MOESM1_ESM.pdf]

**a** ATGCGCATCTGTTTCTGTCGTATCGATTC AATTCATTGTCACAGCGCTTGTATTGCGAACTTACCGAACGCGAACAC  
 GAAGTTAGCGTGGAATTAGACGTCCATCCTGATCTAACAGTGGAAAGCTGCCGAACGTGTACAAGCCGGATTTGATTATA  
 GCTCCGTTTCTTAAACGGAAAATTCGCGAGGAAGTCTGGAAAAAGTACAAAACGCTGATCATTATCCTGGTCCGCCG  
 GGAGATCGTGGTCCGAATGCGCTCGATTGGGCGATCATGAAAGGGGAACGAATTTGGGGCGTCACTCTGCTGGAAGCA  
 AGTGAAGAATATGATGCAGGTGATGTTTGGGCGTACCGTACCTTTCCATGCGCTTTTGC GCGTAAAGCCTCAATTTAT  
 CGGAATGAAGTGACGGAAGGCGTAGTGG AATGTGTGTTGGAAGCCCTTGAAAACCTTCGAGCGGGGGGATTTTAAGCCA  
 ACACCGCAAAGGAACATTGGTGGAAACCGAAAATGGAGCAGGAGTTACGTCGTGTTGATTGGGAACAGGATGACACC  
 AAAACAGTACTCCGAAAAGTCTATGCGTCTGACAGTCAACCAGGTGCCAGCAGCAAAGTCC TAGGTAAGAGGTCCCTC  
 CTGTTTAAATGCGTACCCGGAAGAAGACTGAAAGGCAAAACAGGTGAAGTGTTAGCATTGCGCGATGAAGCCGTTTGC  
 ATTGGGACGCGTATGGAGCCGATGGATCACTACATGAGGAGCGTAAAAAAGAGAGCATTAAACTGCCCGTTCGCC  
 CGTGTGTTAGGCGAGTTCTCAAAGGCGTGAAAGAAGATCCGATTAAGCCTTGGGAAAAAGTGGACTTTAAAACGTAT  
 CGCGAAATCCTGTATGAGGAGGAAGACGGCATAGGCTTCATTCACTTCAACTTCTATAACGGTGCATGTCCACCGAG  
 CAGTGTATCGTCTTCTGAAACCATCAAATACGCCAAAAACGCCCGGTCAAAGCAATTGTGTTACTGGGTTCTGAG  
 GATTTTTTCTCGAATGGAATGAACCTGAACACCATTTGAGAATGCGGAGAGTCCCGCAGACGAATCGTGGCGCAACATC  
 AACGCTATCGACGATGTGTGCGAAGAGATCCTTAAAACCCCGACAAATTAACGGTTGCTGGCATGCAAGGCAATGCC  
 GGTGCAGGCGGTGTTTTCTCGCACTGACCTGCGATCTGGTTTTTGGCGCGAAGGTGTAGTTTTGAATCCCCACTAC  
 AAAAAATACGGCAATCTGTATGGCTCCGAGTTTTTGGACCTATACGCTGCCAAAACGCGTAGGGTGGGAAAAGGGCAAA  
 GAAGTGATGGAAAACCGTATGCCGATTTCCAGCAAAAAAGCGTTTTGAAATGGTCTGATTGACGGCGTTTTTCGAAAA  
 ACCCCGAAAGAGTTTTCGTCAGCGTCTGAAGGAACGCATCAAAAACCTTATTAACAGCAAAGATTTCTACGAGTTTATC  
 GAAAAGAGAAAAAGGAGCGTACTAGTGGGAATGGCTGGAGGAAATCCAGAAGTGTGCGGAACATGAACTGGAAAA  
 ATGAAGCTGAACTTTTATGGCTTCGACACCAGCTACCATATTGCTCGTACTACTTTGTGCGCCGTAACCCACTTT  
 CGTACTCCACCGTATCTGGCGATCCATCGCAGACTGAAATTCCTCGCTGTGA

**b** MRILFLSYRFNSLSQRLYCELT EREHEVSVELDVHPDLTVEAAELYKPDLI IAPFLKRKIPQEVWKKYKTLIIHPGPP  
 GDRGNALDWAIMKGERIWGVTLLEA SEEYDAGDVWAYRTFPMRFARKASIYRNEVTEGVVECVLEALENFERGDFKP  
 TPQKEHWWNPKMEQELRRVDWEQDDTKTVLRKVYASDSQPGASSKVLGKEVLLFNAYPEEELKKGKPEVLALRDEAVC  
 IGT RDGAVWI THMRERKKE SIKLPSARVLGEFLKGVKEDPIKPEKVDFKTYREILYEEEDGIGFIHFNFYNGAMSTE  
 QCYRLLFTIKYAKRKPVKAI VLLGSEDFFSNGMNLNTIENAESPADES WRNINAI DDVCEEILKTPDKLTVAGMQGNA  
 GAGGVFLALTCDLVFAREGVVLNPHYKNIGNLYGSEFWTYTLPKRVGWEKGKEVMENRMP ISSKKA FEIGLIDGVFGK  
 TPKEFRQLRKERIKNF INSKDFYEFIEKKKERTSGEWLEEIQKREHELEKMKLNFYGFDTSYHIARYYFVRRKPHF  
 RTPPYLAHRRLLKFSL

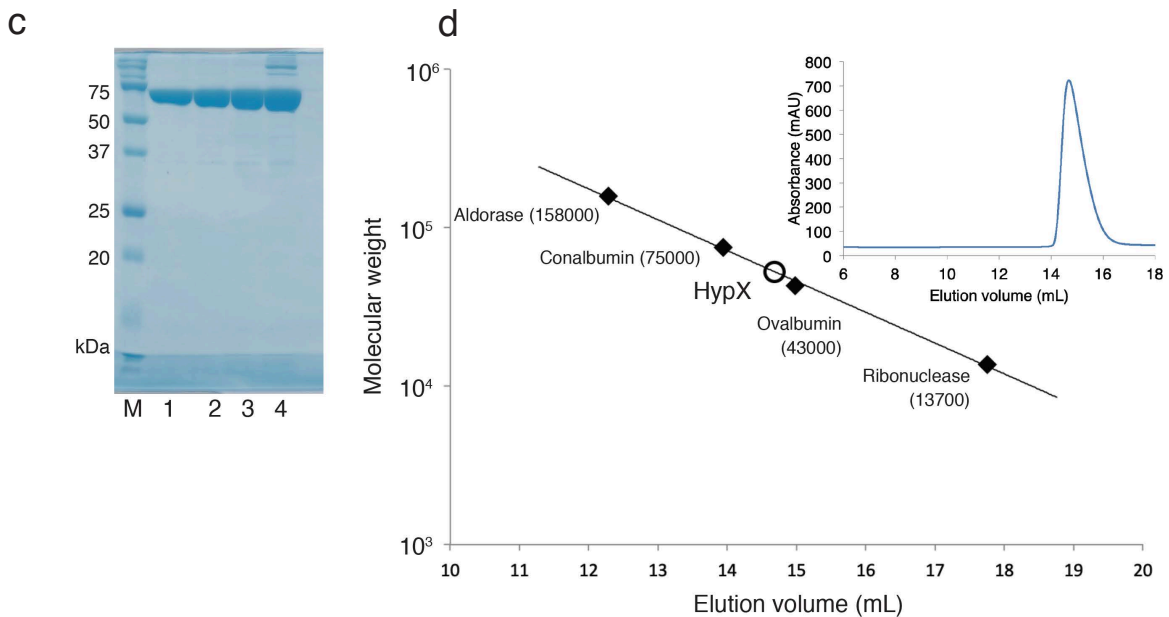

Supplementary Fig. 1. (a) DNA and (b) amino acid sequences of HypX. (c) SDS-PAGE of HypX. M: molecular weight markers, lane 1: wild type HypX, lane 2: R9A-Q15A-R131A-R542A variant, lane 3: Q15A-R131A-S194AQ195A-N306A-R542A variant, lane 4: A392F-I419F variant. (d) Estimation of the mass of HypX. The closed squares show the standard proteins. The vertical axis is in logarithmic scale. (Inset) Elution profile of HypX from a Superdex 200 10/300GL column. HypX (65.5 kDa in monomer) was eluted with an apparent mass of 52.7 kDa, indicating that HypX exists as a monomer in solution.

a

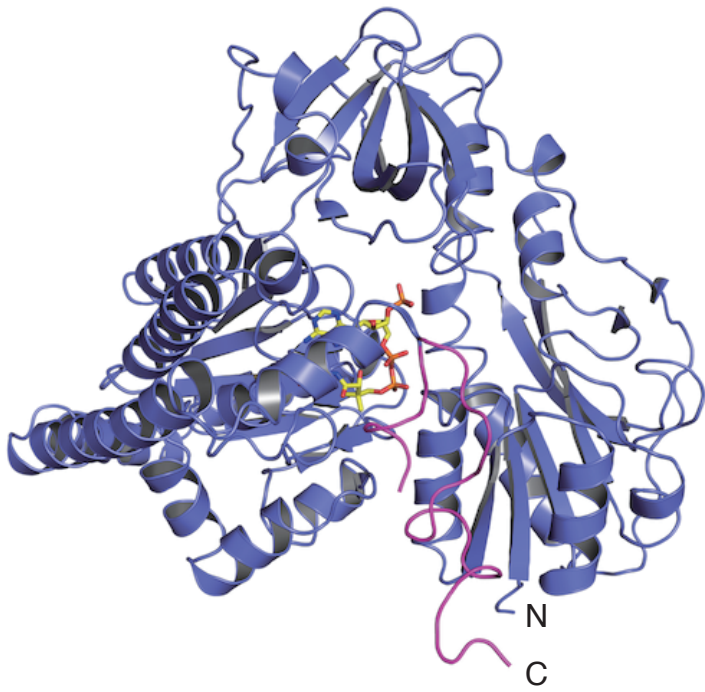

b

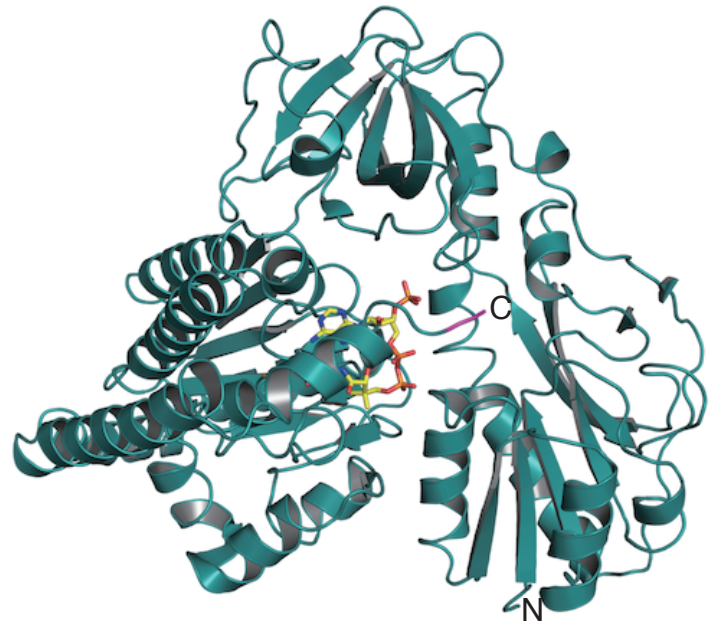

Supplementary Fig. 2. Overall structure of HypX. (a) Chain B of crystal form I (PDB ID: 6J0P) and (b) crystal form II (PDB ID: 6J1E). The r.m.s.d. values were 0.462 Å, 0.414 Å, and 0.596 Å between the chains A and B, the chain A and Form II, and the chain B and Form II, respectively. While clear electron density was observed from the N- to C-terminus in chain A of Form I, the electron density of the C-terminal 18 residues (His545-Leu562) was not observed in Form II. Overall structures of Form I (chains A and B) and Form II were same.

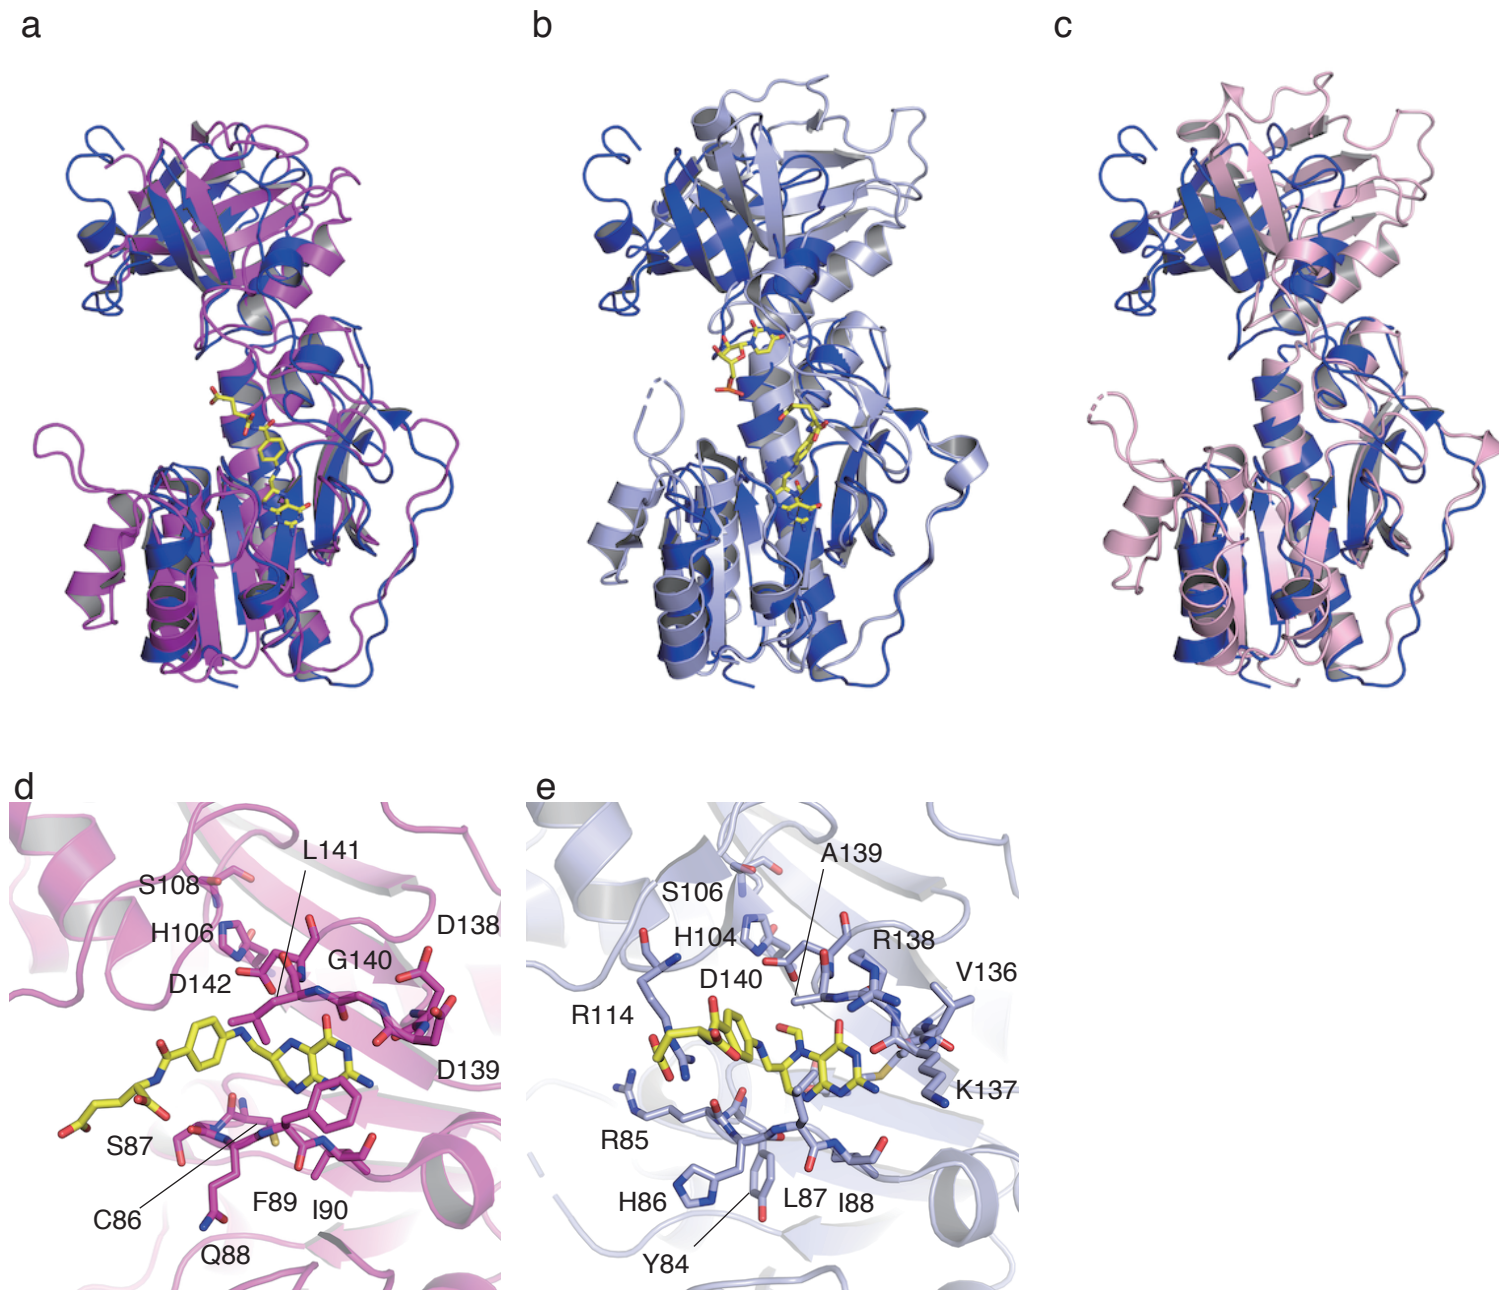

Supplementary Fig. 3. Superposition of the N-terminal domain of HypX (blue) with (a) FDH (purple), (b) ArnA (gray), and (c) FMT (pink). The structures of FDH and ArnA are the THF-bound form. Close-up view of the THF binding region in (d) FDH and (e) ArnA.

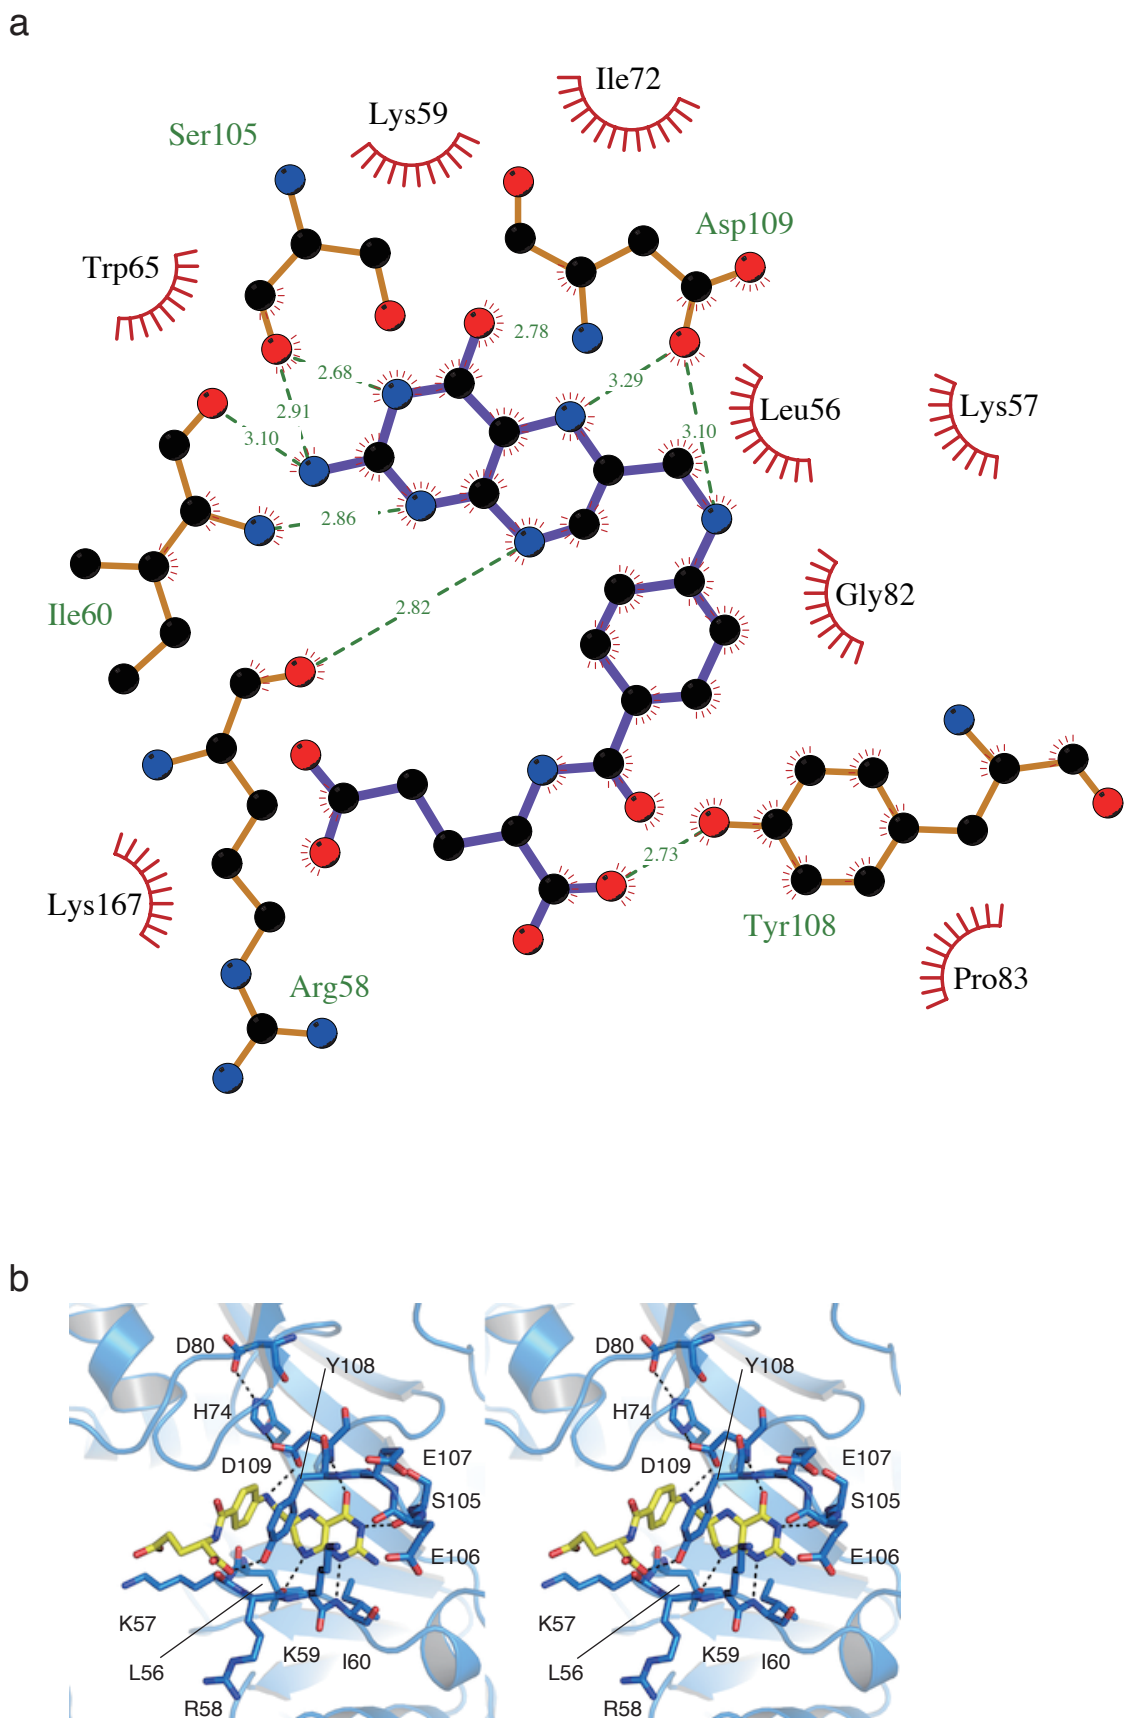

Supplementary Fig. 4. (a) Interaction diagrams for THF and HypX interactions, which were drawn by LigPlot+ (Laskowski, R. A., Swindells, M. B. LigPlot+: multiple ligand-protein interaction diagrams for drug discovery. *J. Chem. Inf. Model.*, 51, 2778-2786 (2011)). (b) Stereo view of the THF binding region in the N-terminal domain of HypX. Hydrogen bonds are shown in dashed lines.

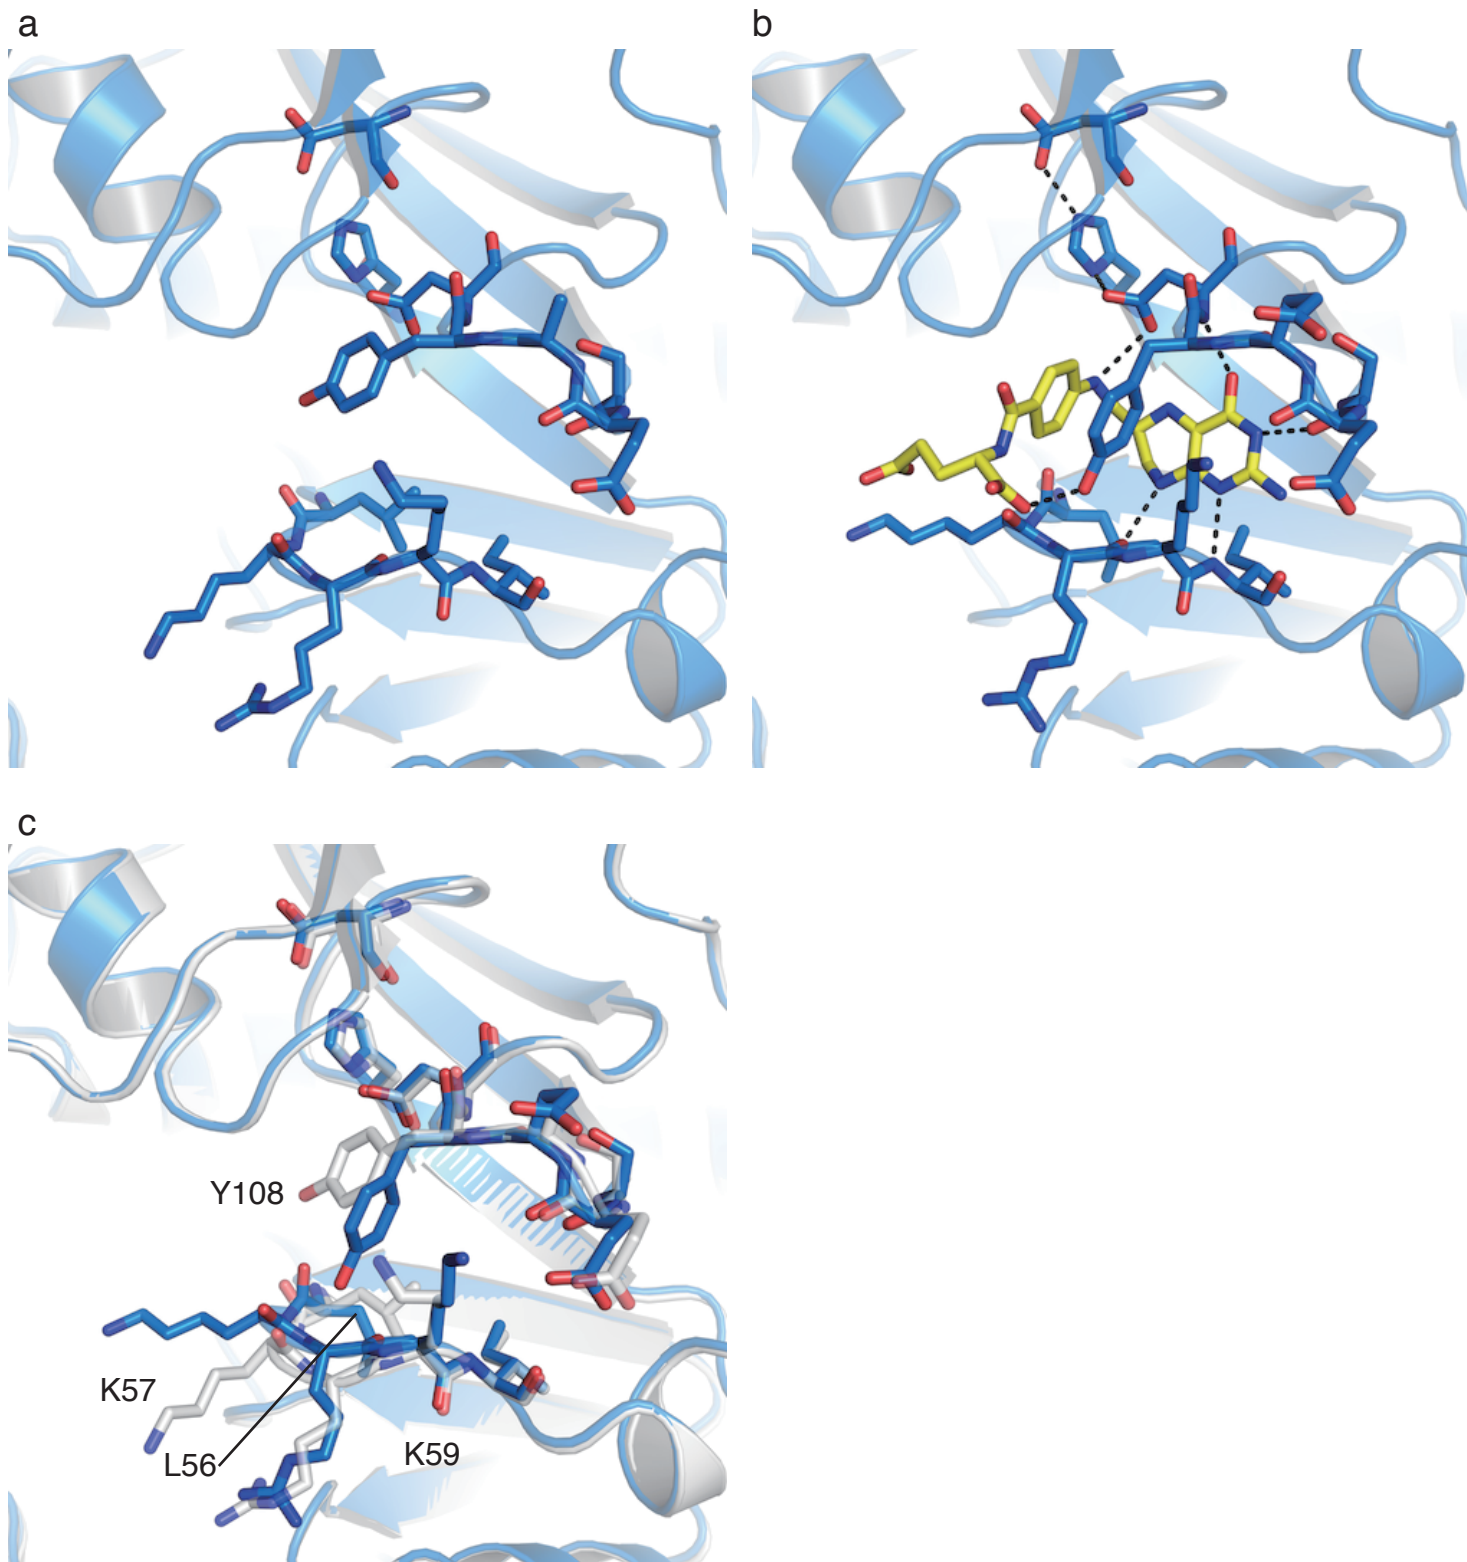

Supplementary Fig. 5. Conformational change of wild type HypX upon THF binding. Close-up view of the THF binding region (a) in the THF-free and (b) in the THF-bound forms. (c) Superposition of (a) and (b). THF is omitted for clarity. The structures of (a) and (b) are shown in blue and light gray, respectively.

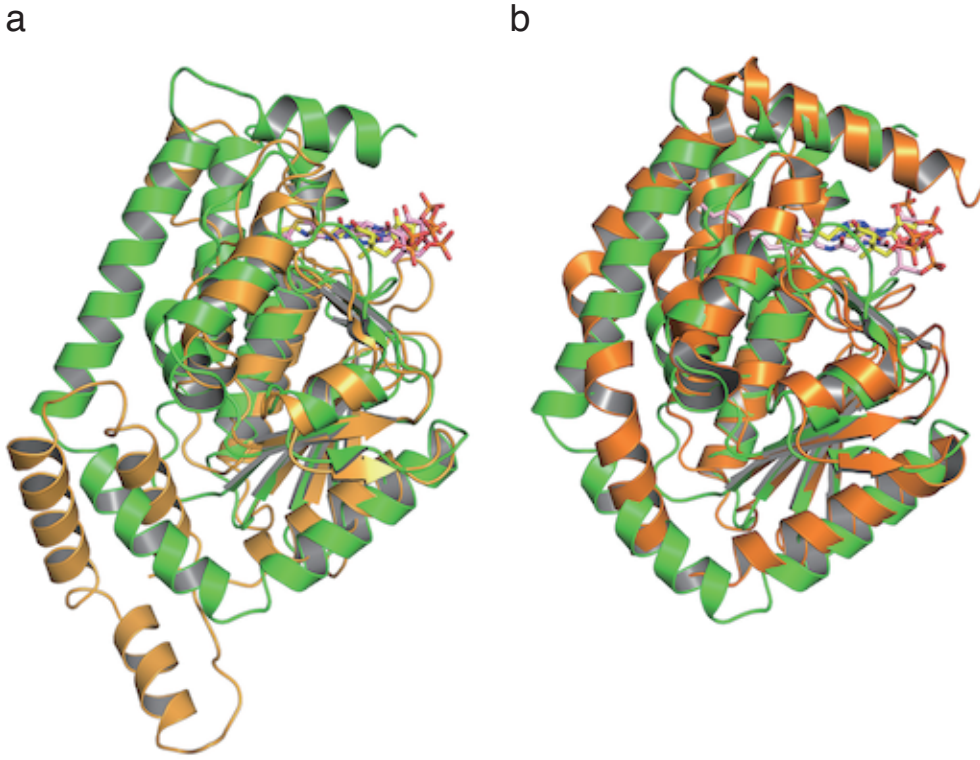

Supplementary Fig. 6. Superposition of the C-terminal domain of HypX (green) with (a) the core domain of ECH (brown, PDB ID: 1dub) and (b)  $\Delta 3$ - $\Delta 2$ -enoly-CoA isomerase (brown, PDB ID: 1sg4). The r.m.s.d. values compared with the C-terminal domain of HypX are 2.24 Å for the both of ECH and ECI. While HypX and ECI (PDB ID: 1sg4) are monomer, ECH forms a homotrimer in which the C-terminal three helices are domain-swapped (PDB ID: 1dub). Therefore, the core region except for the C-terminal three helices in ECH was used to calculate the r.m.s.d. value between HypX and ECH.

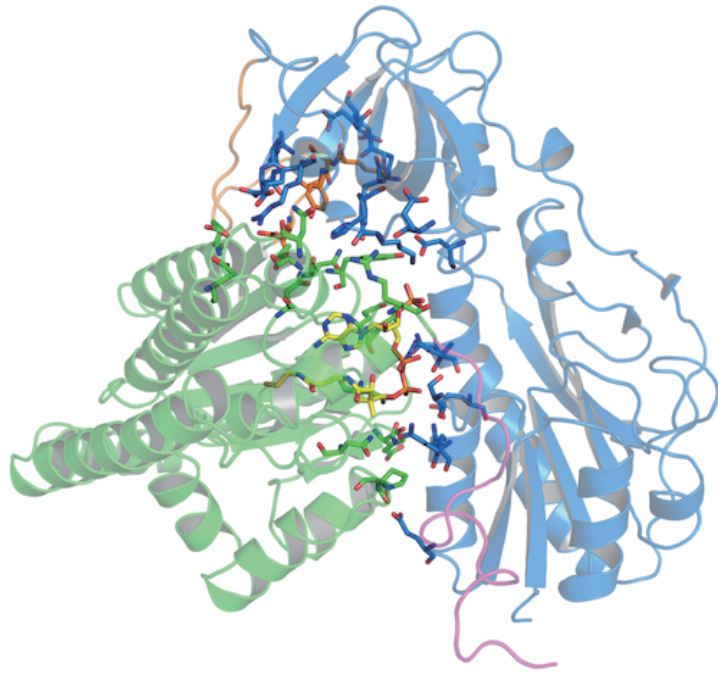

Supplementary Fig. 7. Hydrogen bonds in the interface between the N- and C-terminal domains. Amino acid residues and water molecules involved the hydrogen bonding interactions are shown in the stick model and red balls, respectively.

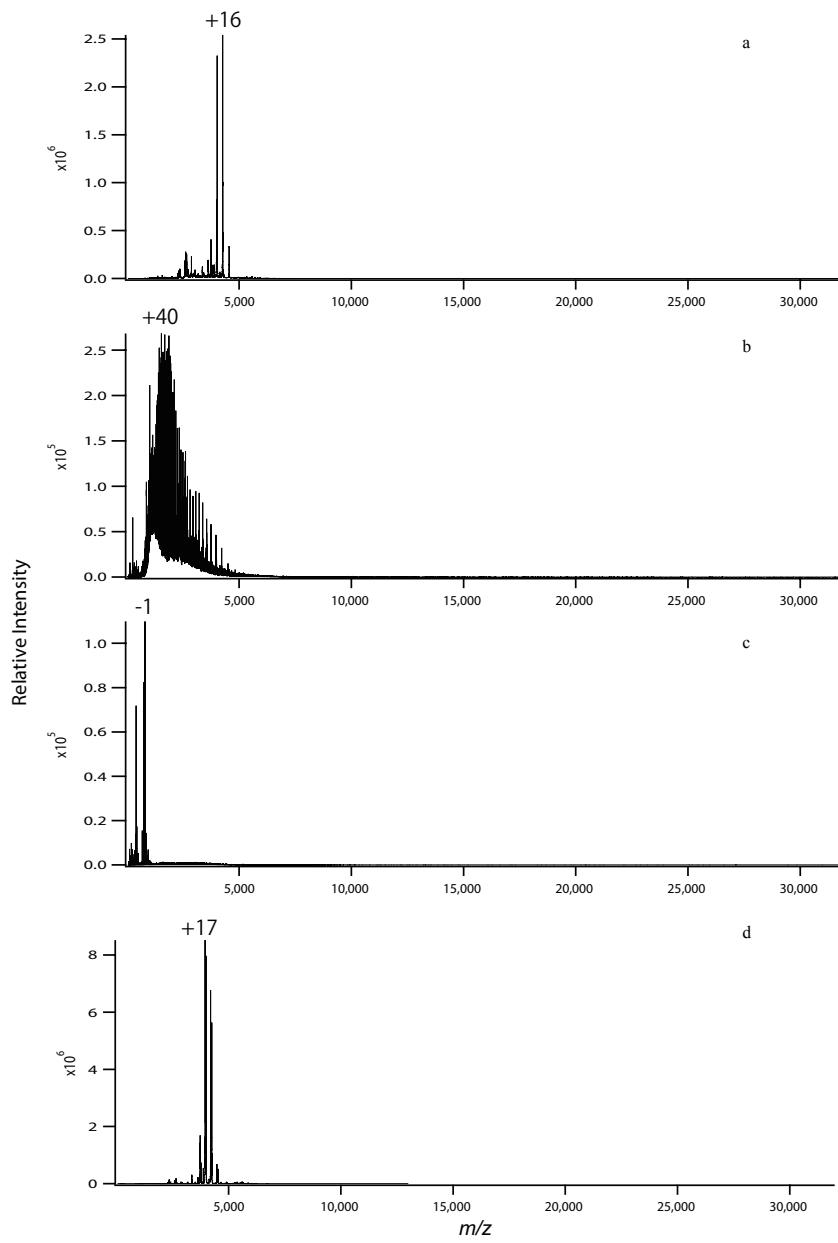

Supplementary Fig. 8. Full  $m/z$  range native mass spectra of Fig.6 in the main text.



a

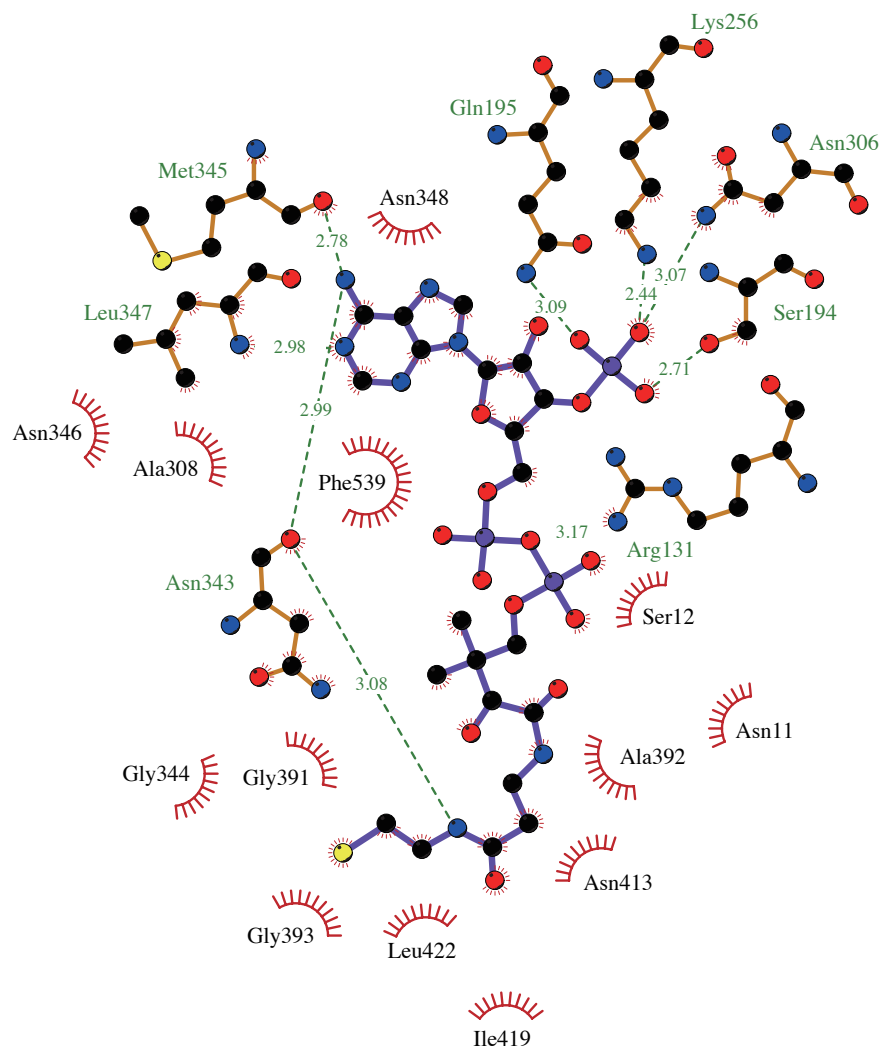

b

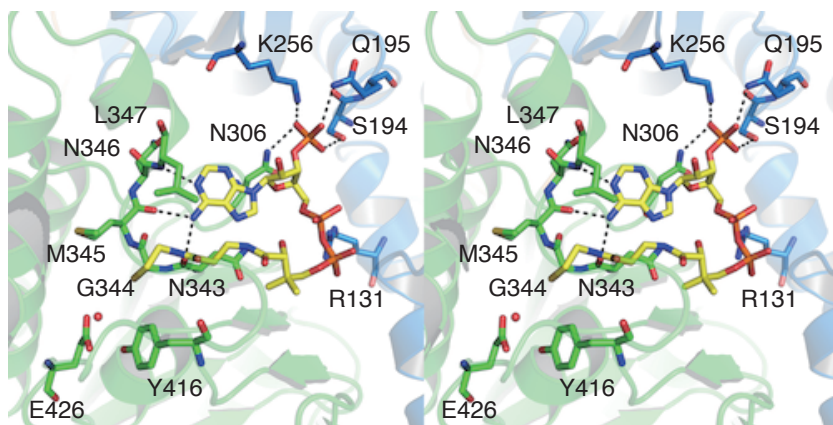

C

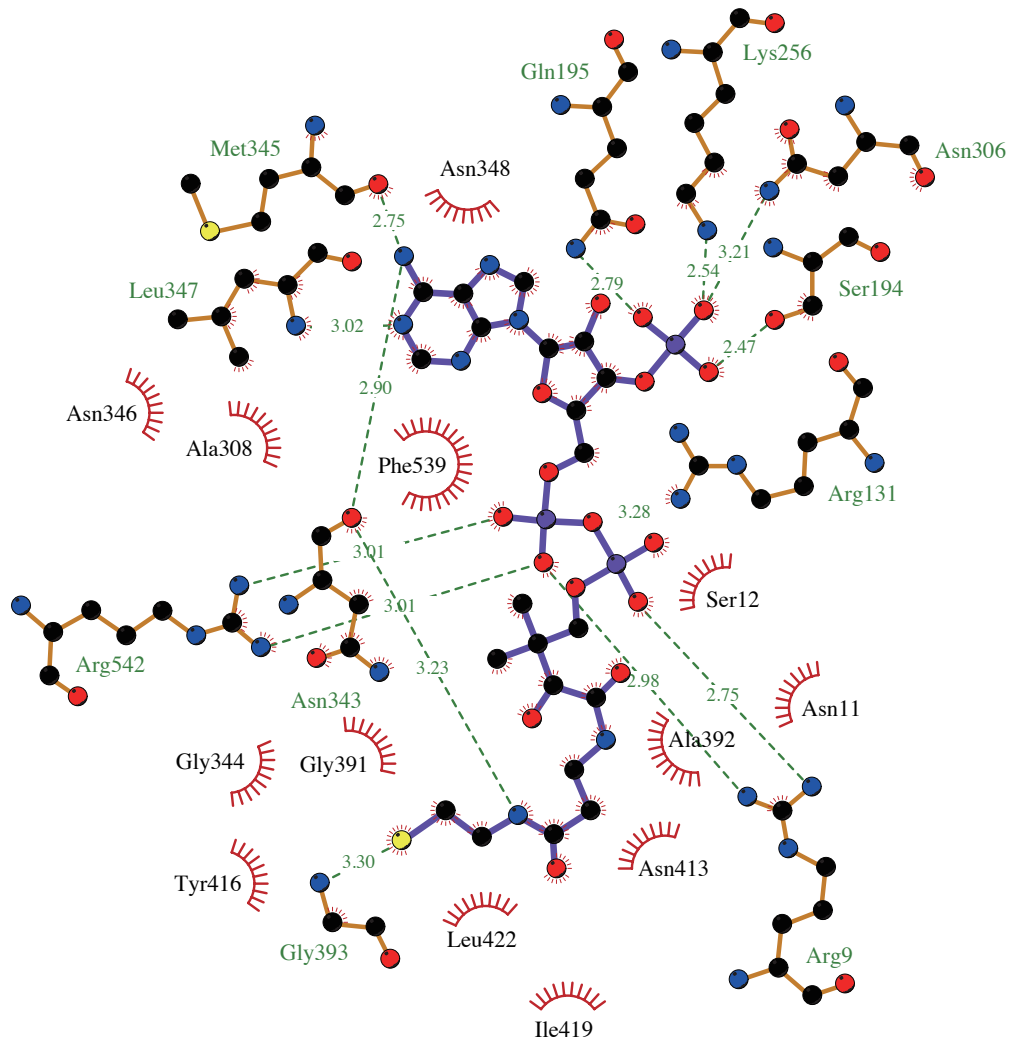

Supplementary Fig. 9. (a) Interaction diagrams (LigPlot+) for CoA and HypX interactions in the form I. (b) Stereo view of the CoA binding region in Form I. (c) LigPlot+ plot for CoA and HypX (form II).

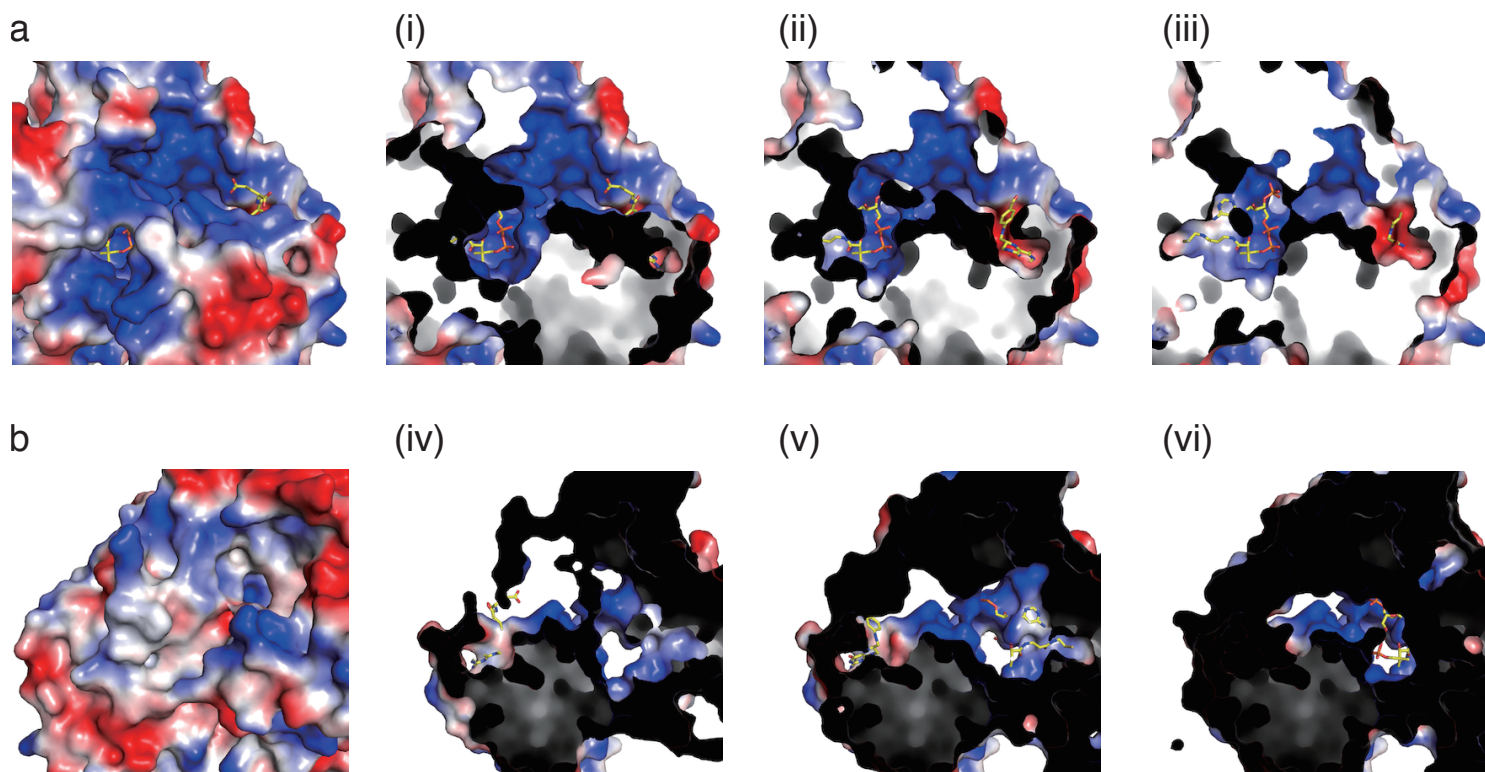

Supplementary Fig. 10. The cross-sectional views of HypX from the front (a) and the back (b). Positive and negative regions on the protein surfaces and the lining of the cavity are shown in blue and red, respectively. The orientation of (a) is the same as Fig. 5b. Cross sections from (i) to (iii) and from (iv) to (vi) are from the surface to the inside with arbitrary depths in (a) and (b), respectively.

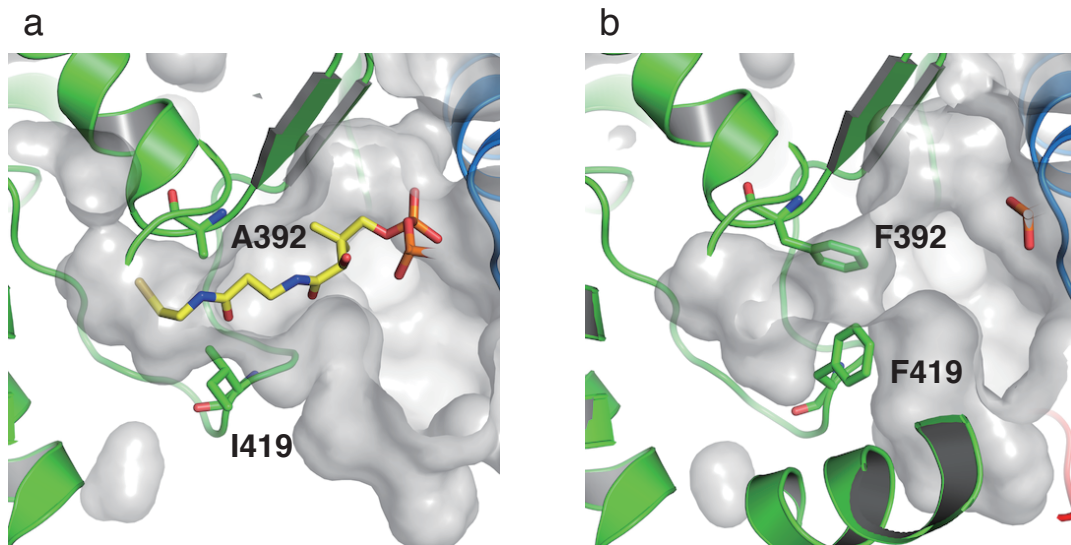

Supplementary Fig. 11. (a) Close-up view of the region around Ala392 and Ile419 in the cavity of wild type HypX. (b) Close-up view of the same region in the A392F-I419F variant. The cavity inside HypX is shown in gray.

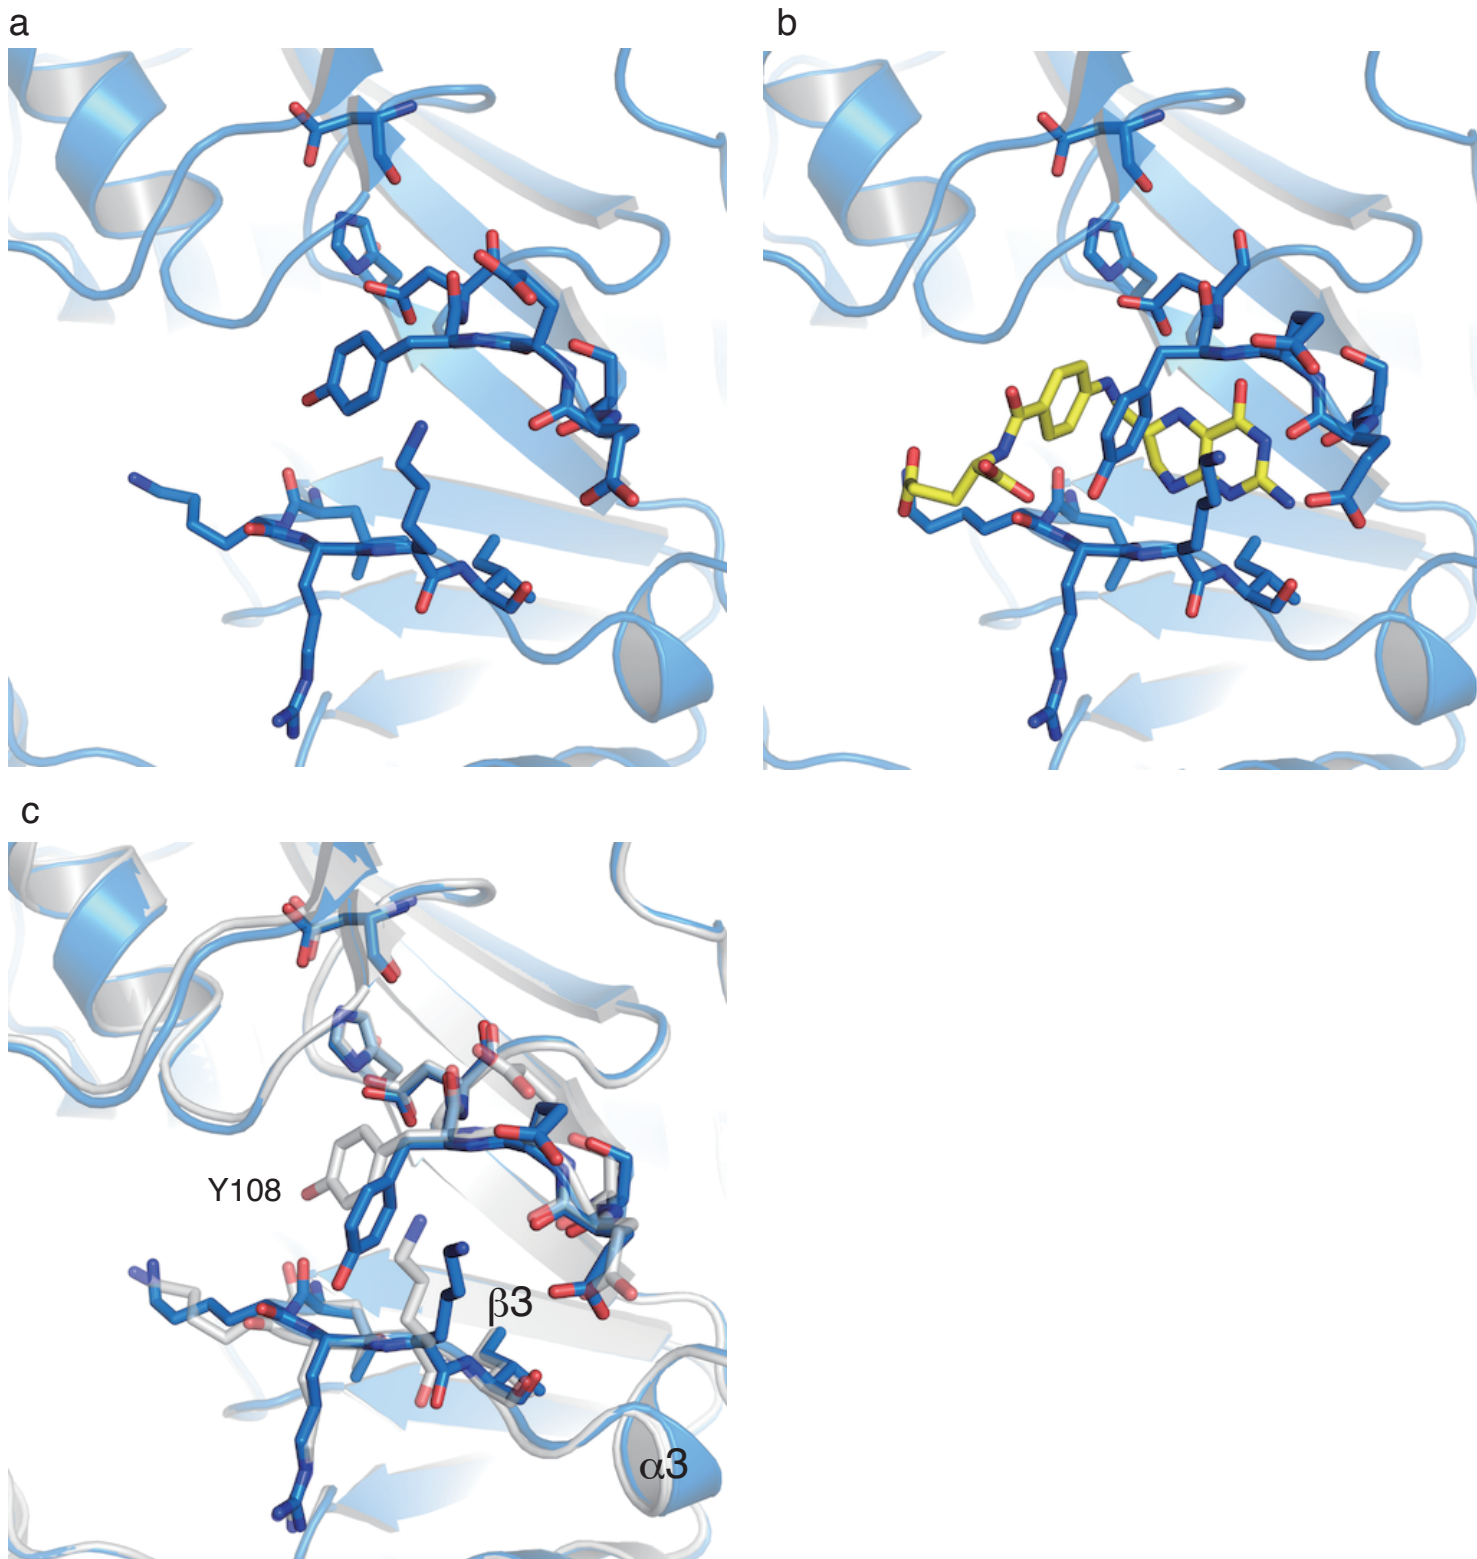

Supplementary Fig. 12. Conformational change of the A392F-I419F variant upon THF binding. Close-up view of the THF binding region (a) in the THF-free and (b) in the THF-bound forms. (c) Superposition of (a) and (b). THF is omitted for clarity. The structures of (a) and (b) are shown in blue and light gray, respectively.

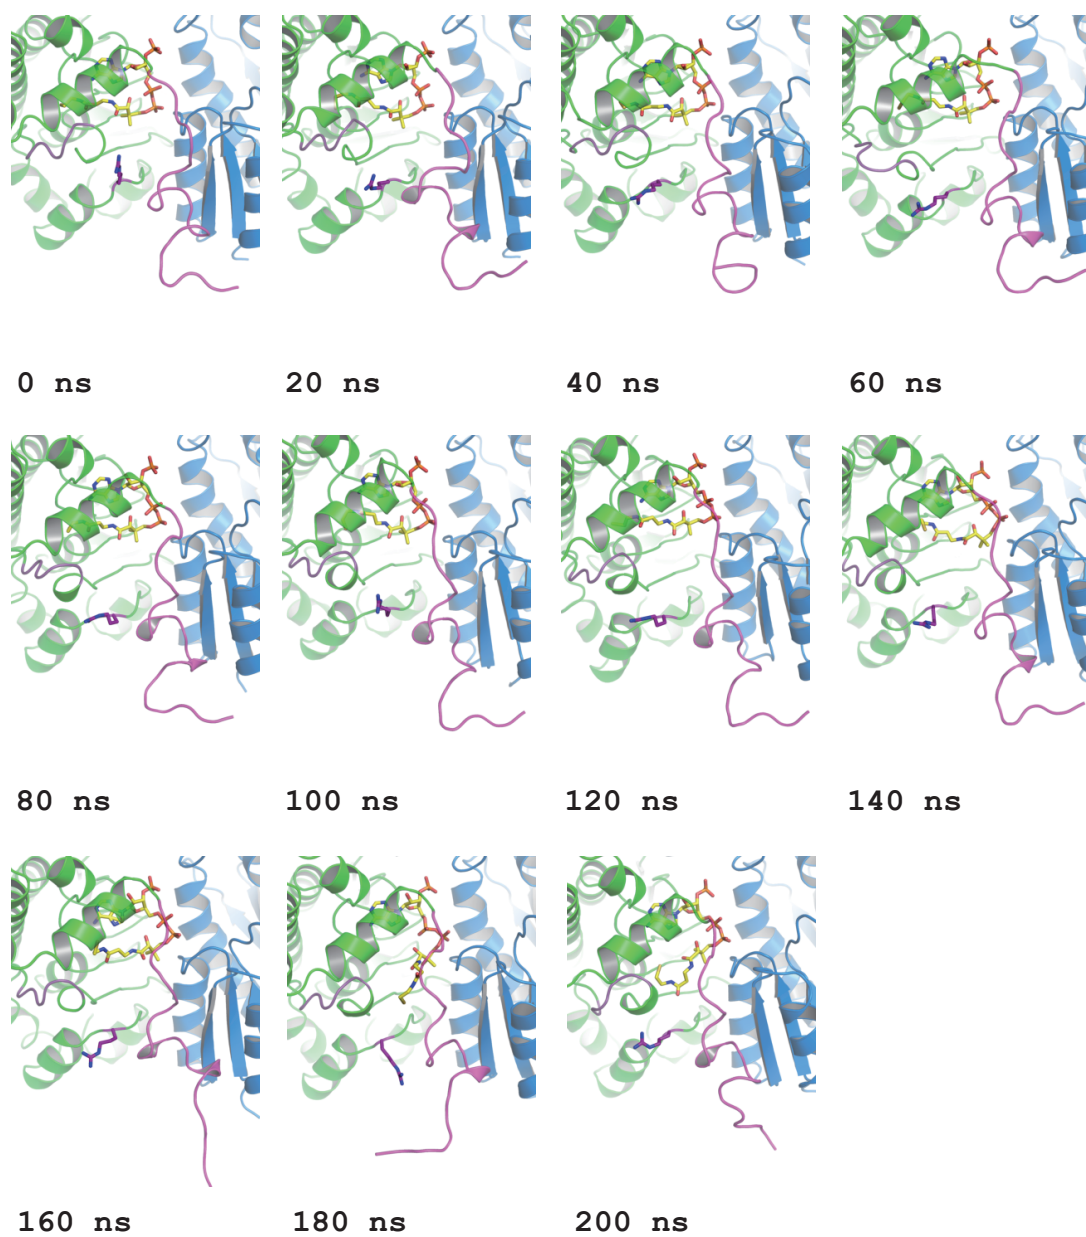

Supplementary Fig. 13. Snap shot views of the MD simulations per 20 ns. The  $\beta 7$  - $\beta 8$  loop (residues 419-423) and Arg448 are shown in purple and the C-terminal tail is shown in magenta. CoA is shown in the stick model.

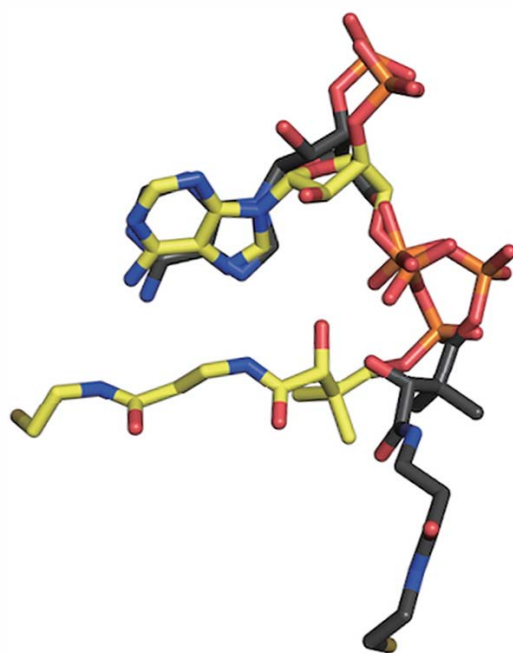

Supplementary Fig. 14. Superposition of the folded CoA (yellow and orange) in wild-type HypX and the partially folded CoA (black) observed in the MD simulation.

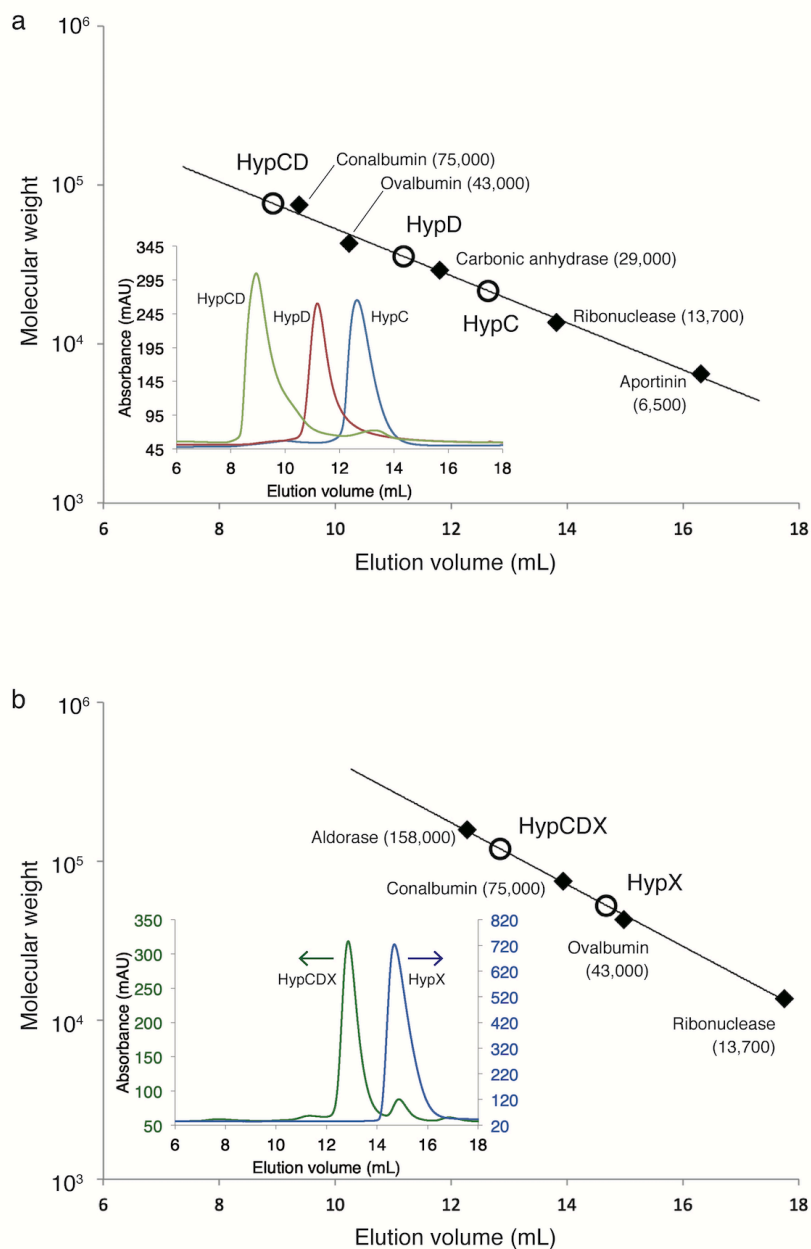

Supplementary Fig. 15. (a) Estimation of the mass of HypC, HypD, and HypC/HypD complex. The closed squares show the standard proteins. The vertical axis is in logarithmic scale. (Inset) Elution profiles of HypC, HypD, and HypC/HypD mixture from a Superdex75 10/300GL column. (b) Estimation of the mass of HypX and HypC/HypD/HypX complex. The vertical axis is in logarithmic scale. (Inset) Elution profiles of HypX and HypC/HypD/HypX mixture from a Superdex200 10/300GL column.



Supplementary Table 1. Hydrogen bonds in the interface between the N- and C-terminal domains. The amino acids in the direct hydrogen bond interactions (left) and the amino acids in the hydrogen bonds via water molecules (right).

| N-terminal domain | C-terminal domain | Distance |
|-------------------|-------------------|----------|
| Asn132 ND2        | Asp339 OD1        | 2.84     |
| Glu136 OE2        | Arg407 NH1        | 2.93     |
| Glu23 OE1         | Ser452 OG         | 2.58     |
| Glu23 OE2         | Ser452 N          | 3.03     |
| Gln15 OE1         | Asn413 ND2        | 2.88     |
| Tyr213 OH         | Asn303 ND2        | 2.77     |
| Asp193 OD1        | Tyr305 OH         | 2.62     |
| Lys256 NZ         | Tyr305 OH         | 3.03     |
| Lys256 O          | Asn348 ND2        | 2.90     |
| Gly253 O          | Arg541 NH1        | 2.42     |
| Arg261 NH2        | Glu312 OE1        | 3.02     |

| N-terminal domain | C-terminal domain |
|-------------------|-------------------|
| Asn132 OD1        | Glu338 O          |
| Arg131 NH1        | Asp339 O          |
| Arg131 NH1        | Asn389 ND2        |
| Ser12 O           | Asn389 ND2        |
| Ser12 O           | Asn389 ND2        |
| Arg131 O          | Arg407 NH2        |
| Glu136 OE2        | Arg407 NH2        |
| Glu136 OE1        | Glu408 O          |
| Glu23 OE2         | Pro450 O          |
| Arg16 NH1         | Gly409 O          |
| Asn211 OD2        | Asn303 O          |
| His246 NE2        | Asn346 ND2        |
| Arg261 NH1        | Asn352 ND2        |
| Arg261 NH1        | Thr349 O          |
| Arg261 NH1        | Glu359 OE2        |
| Arg261 NH1        | Glu312 OE1        |
| Asp230 O          | Glu288 OE2        |
| Asp230 O          | Arg316 NH2        |
| Asp230 OD2        | Glu288 OE1        |
| Glu231 OE1        | Arg316 NH1        |
| Glu231 OE1        | Ser310 OG         |

Supplementary Table 2. Primers used for mutagenesis, in which the mutated codon(s) is shown in red.

| Mutation(s) | Primer(s)                                                                              |
|-------------|----------------------------------------------------------------------------------------|
| R9A         | 5'- CGCATCCTGTTTCTGTCGTATGCATTCAATTCATTGTCAGCG                                         |
| Q15A        | 5'- CGATTCAATTCATTGTCAGCGCGCTTGTATTGCGAAC<br>5'- GTTCGCAATACAAGCGCGCTGACAATGAATTGAATCG |
| R131A       | 5'- CGTAAAGCCTCAATTTATGCGAATGAAGTGACGGAAGGC                                            |
| Q194A-Q195A | 5'- GTCTATGCGTCTGACGCTGCAACCAGGTGCCAGCAGCAAAG                                          |
| N306A       | 5'- CATTCACTTCAACTTCTATGCTGGTGCATGTCCACCGAGC                                           |
| A392F       | 5'- CATGCAAGGCAATGCCGGTTTCGGCGGTGTTTTCCCTCGC                                           |
| I419F       | 5'- GAATCCCCACTACAAAAATTTCGGCAATCTGTATGGCTCC                                           |
| R542A       | 5'- CGTACTACTTTGTGCGCGCTAAACCCCACTTTCGTACTCC                                           |
